# Supplementary material
Source: Springer Nature journal article supplement (https://www.springermedizin.de/resource/supplementary/12913_2011_2143_MOESM1_ESM.pdf/9530054)
Supplement: MOESM1 [file 9530054]

## Additional file 1

### Measurement and valuation of Indigenous Health Service Delivery Template components

Intervention delivery via Aboriginal Community Controlled Health Services compared to mainstream general practitioner services, combined across all remoteness locations

| Component                                                 | Quantity (measurement)                                                                                                                                                      | Cost (value)                                   | Additional cost per patient encounter                                                | Sources                                                                                      |
|-----------------------------------------------------------|-----------------------------------------------------------------------------------------------------------------------------------------------------------------------------|------------------------------------------------|--------------------------------------------------------------------------------------|----------------------------------------------------------------------------------------------|
| Cost of consultation in mainstream GP practices           | -                                                                                                                                                                           | \$30.85 short consult,<br>\$58.55 long consult | -                                                                                    | Medicare Benefits Schedule 2003 [1]                                                          |
| <b>Basic health intervention delivery characteristics</b> |                                                                                                                                                                             |                                                |                                                                                      |                                                                                              |
| Role substitution                                         | Proportional substitution of general practitioner with Aboriginal health worker or nurse<br><br>Longer average consultation lengths associated with different practitioners | Composite wage rate                            | \$11.75 per short consultation (including on-costs)<br>\$26.65 per long consultation | Service Activity Reports (SARs) data 2003-04 [2]<br>Econtech Pty Ltd, 2004 [3]<br>Interviews |
| Compliance management                                     | 1.5 hrs/wk per full time staff member                                                                                                                                       | Nurse wage rate                                | \$2.13                                                                               | SARs data 03-04 [2]<br>Econtech Pty Ltd, 2004 [3]<br>Interviews                              |
| Home visits                                               | 10% of consults cf. 1.8% in mainstream                                                                                                                                      | \$21.10 per home visit                         | \$2.79                                                                               | Larkins, 2006 [4]<br>Thomas, 1998 [5]<br>MBS 2003 [1]<br>Interviews                          |
| Paperwork/Case conferencing                               | Equivalent to mainstream                                                                                                                                                    | -                                              | -                                                                                    | Interviews                                                                                   |
| Training activities                                       | Equivalent to mainstream                                                                                                                                                    | -                                              | -                                                                                    | Interviews                                                                                   |
| Management of complex medical conditions                  | Included in longer consultation lengths                                                                                                                                     | -                                              | -                                                                                    | Interviews                                                                                   |
| Opportunistic screening of family members                 | Included in total number of patient consultations in health service                                                                                                         | -                                              | -                                                                                    | Interviews                                                                                   |
| <b>Population health, social and community activities</b> |                                                                                                                                                                             |                                                |                                                                                      |                                                                                              |
| Other consultative services                               | 36% of all urban consults, 23% rural, 15% remote                                                                                                                            | Composite allied health wage rate              | \$9.28 (including on-costs)                                                          | SARs data 03-04 [2]<br>Econtech Pty Ltd, 2004 [3]<br>Interviews                              |
| Service substitution                                      | Not costed in study                                                                                                                                                         | -                                              | -                                                                                    | No adequate source found                                                                     |

|                                                                                          |                                                                                                                           |                                                                            |                                           |                                                                                                                                    |
|------------------------------------------------------------------------------------------|---------------------------------------------------------------------------------------------------------------------------|----------------------------------------------------------------------------|-------------------------------------------|------------------------------------------------------------------------------------------------------------------------------------|
| Health promotion/health education                                                        | Included in longer consultation lengths                                                                                   | -                                                                          | -                                         | Sibbald, 2006 [6]                                                                                                                  |
| Community development                                                                    | Included under 'community management boards' component                                                                    | -                                                                          | -                                         | Interviews                                                                                                                         |
| Community space                                                                          | -                                                                                                                         | Not costed as does not incur significant health service cost               | -                                         | Interviews                                                                                                                         |
| <b>Administration, management and governance structures</b>                              |                                                                                                                           |                                                                            |                                           |                                                                                                                                    |
| Overheads                                                                                | 30% loading for existing staff<br>60% loading for new and remote staff                                                    | Composite wage rate                                                        | Included in 'role substitution' component | ACE-Prevention economic protocol [7]                                                                                               |
| Community management boards                                                              | Ne board per service                                                                                                      | \$4000 per annum administrative expenses                                   | \$0.29                                    | Victorian Department of Human Services [8]                                                                                         |
| Management, Economic, Social, Human (MESH) infrastructure (Management capacity building) | Currently excluded from analysis as considered a start-up cost and not in line with 'steady state' assumption of analysis | -                                                                          | -                                         | Henry, 2003 [9]<br>Houston, 2003 [10]<br>ACE-Prevention economic protocol [7]                                                      |
| Additional management activities                                                         | 80% full time equivalent management position                                                                              | Management wage rate                                                       | \$3.58                                    | Interviews<br>Australian Industrial Relations Commission, 2005 [11]                                                                |
| <b>Patient transport services</b>                                                        |                                                                                                                           |                                                                            |                                           |                                                                                                                                    |
| Patient transport                                                                        | 50% patients cf. 7% in mainstream<br>Distance: 20km urban areas cf. 32km in mainstream                                    | \$2.12 per km cf. \$0.75 in mainstream                                     | \$47.01                                   | NSW Transport Planning and Management and Applied Economics, 2001 [12]<br>SARs data 03-04 [2]<br>Interviews                        |
| <b>Provision of services to a large remote population</b>                                |                                                                                                                           |                                                                            |                                           |                                                                                                                                    |
| Out of hours emergency care                                                              | 52% remote ACCHSs<br>Emergency equipment<br>20 hours overtime per service per week<br>Annual staff training               | \$3900 cardiac defibrillator<br>Composite wage rate<br>\$2000 training fee | \$1.31                                    | Rural Ambulance Victoria, 2007 [13]<br>Australian Industrial Relations Commission [14-16]<br>Mole, 2006 [17]<br>O'Meara, 2002 [18] |
| Outreach services                                                                        | 4 weekly visits of 9 hours duration                                                                                       | Composite wage rate                                                        | \$2.30                                    | Battye, 2003 [19]<br>SARs data 03-04                                                                                               |

|                                                            |                                                                                                                                                                                                                                                                                                                                                                         |                                                                                             |                                                                              |                                                                                                          |
|------------------------------------------------------------|-------------------------------------------------------------------------------------------------------------------------------------------------------------------------------------------------------------------------------------------------------------------------------------------------------------------------------------------------------------------------|---------------------------------------------------------------------------------------------|------------------------------------------------------------------------------|----------------------------------------------------------------------------------------------------------|
|                                                            | 2.5 staff<br>60% on-costs<br>Average 2.9 sites 170 km<br>from main service                                                                                                                                                                                                                                                                                              | \$2.15 per km<br>travelled                                                                  |                                                                              | [2]<br>Interviews                                                                                        |
| Staff housing and<br>relocation                            | Housing for 4 staff per<br>service<br>1 relocation grant 2 yearly                                                                                                                                                                                                                                                                                                       | Housing \$219<br>per week<br>Relocation<br>grant \$20,000                                   | \$1.89                                                                       | Australian Rural<br>and Remote<br>Workforce<br>Agencies Group,<br>2007 [20]<br>Realestate.com.au<br>[21] |
| Pharmaceuticals<br>and pathology                           | n/a                                                                                                                                                                                                                                                                                                                                                                     | 60%<br>pathology<br>cost loading<br>in remote<br>areas                                      | n/a                                                                          | Interviews                                                                                               |
| <b>Differences in Indigenous utilisation and adherence</b> |                                                                                                                                                                                                                                                                                                                                                                         |                                                                                             |                                                                              |                                                                                                          |
| Indigenous rates of<br>utilisation of health<br>services   | Indigenous utilisation of<br>mainstream services 60%<br>that of non-Indigenous<br>based on BEACH (Bettering<br>the Evaluation and Care of<br>Health) data<br>22% improvement in<br>Indigenous utilisation with<br>culturally appropriate<br>services based on local<br>evaluation, therefore 73% of<br>non-Indigenous utilisation<br>rate in ACCHSs                     | n/a                                                                                         | n/a                                                                          | Pink, 2008 [22]<br>Katherine West<br>CCT evaluation<br>[23]                                              |
| Indigenous rates of<br>adherence to<br>treatment regimens  | Indigenous adherence in<br>mainstream 78% that of<br>non-Indigenous based on<br>differing rates of vaccination<br>coverage<br>23% improvement in<br>vaccination rates in very<br>remote areas compared to<br>urban areas possibly due to<br>presence of targeted<br>services. Equates to<br>Indigenous adherence in<br>ACCHSs 96% that of non-<br>Indigenous population | n/a                                                                                         | n/a                                                                          | Hull, 2004 [24]<br>Haynes, 2004 [25]                                                                     |
| <b>Cost offsets</b>                                        |                                                                                                                                                                                                                                                                                                                                                                         |                                                                                             |                                                                              |                                                                                                          |
| Cost offsets                                               | n/a                                                                                                                                                                                                                                                                                                                                                                     | Cost-offsets<br>based on<br>average<br>case-<br>adjusted<br>inpatient<br>treatment<br>costs | 1.19 ratio<br>between<br>Indigenous<br>and non-<br>Indigenous<br>populations | Fisher, 1998 [26]                                                                                        |

## References

1. Department of Health and Ageing, Australian Government: **Medicare Benefits Schedule Book**. Commonwealth of Australia, Canberra; 2003.
2. Office for Aboriginal and Torres Strait Islander Health, National Aboriginal Community Controlled Health Organisation: **Service Activity Reporting: 2003-04 Key Results**. Canberra; 2006.
3. Econtech Pty Ltd: **Costing models for Aboriginal and Torres Strait Islander health services**. Commonwealth of Australia,, Canberra; 2004.
4. Larkins SL, Geia LK, Panaretto KS: **Consultations in general practice and at an Aboriginal community controlled health service: do they differ?** *Rural Remote Health* 2006, **6**:560.
5. Thomas DP, Heller RF, Hunt JM: **Clinical consultations in an aboriginal community-controlled health service: a comparison with general practice**. *Aust N Z J Public Health* 1998, **22**:86-91.
6. Sibbald B, Laurant MG, Reeves D: **Advanced nurse roles in UK primary care**. *Med J Aust* 2006, **185**:10-12.
7. Carter R, Vos T, Barendregt J: **ACE-Prevention Economic Evaluation Protocol**. Deakin University, Melbourne and the University of Queensland, Brisbane; 2005.
8. Department of Human Services: **Appointments to Community Health Centre Boards of Management**. State Government of Victoria, Melbourne; 2007.
9. Henry BR, Mooney GH: **Improving Aboriginal health: more than just chucking more money at it. SPHERE report in primary health care funding of Aboriginal health**. Social and Public Health Economics Research Group, Curtin University of Technology; 2003.
10. Houston S: **The past, the present, the future of Aboriginal health policy**. *PhD Thesis*. Curtin University of Technology, Division of Health Sciences; 2003.
11. Australian Industrial Relations Commission: **AP843641 - Health, Community Services and Ambulance - Management and Administrative Staff (Public Sector - Victoria) Award 2005**. 2005.
12. Transport Planning and Management and Applied Economics: **Non-emergency health-related transport - Facilitating access to health services in NSW**. Sydney; 2001.
13. Rural Ambulance Victoria: **Remote Area Nurse Training**. 2007.
14. Australian Industrial Relations Commission: **Aboriginal and Community Controlled Health Services (Community Health Nursing Staff) Award 2002**. 2007.

15. Australian industrial Relations Commission: **Aboriginal Medical Service Employees' Award**. 2005.
16. Australian Industrial Relations Commission: **Medical Officers (Aboriginal Medical Services) Interim Award 2001**. 2006.
17. Mole J, McGuire D, Riley R, Trehwella N: **Are Perth metropolitan GPs prepared for common medical emergencies?** *Aust Fam Physician* 2006, **35**:553-554.
18. O'Meara P, Burley M, Kelly H: **Rural urgent care models: what are they made of?** *Aust J Rural Health* 2002, **10**:45-50.
19. Battye KM, McTaggart K: **Development of a model for sustainable delivery of outreach allied health services to remote north-west Queensland, Australia.** *Rural Remote Health* 2003, **3**:194.
20. Australian Rural and Remote Workforce Agencies Group: **Supports available to current and future GPs in rural and remote Australia.** [Online] Available at: [http://www.arrwag.com.au/client\\_images/234218.doc](http://www.arrwag.com.au/client_images/234218.doc) [Accessed 4th July 2007].
21. **realestate.com.au** [<http://www.realestate.com.au/>]
22. Pink B, Allbon P: **The health and welfare of Australia's Aboriginal and Torres Strait Islander Peoples.** Australian Bureau of Statistics, Australian Institute of Health and Welfare; 2008.
23. Miyrta J: **Katherine West Coordinated Care Trial: Local Evaluation Final Report.** Menzies School of Health Research; 2000.
24. Hull BP, McIntyre PB, Couzos S: **Evaluation of immunisation coverage for aboriginal and Torres Strait Islander children using the Australian Childhood Immunisation Register.** *Aust N Z J Public Health* 2004, **28**:47-52.
25. Haynes K, Stone C: **Predictors of incomplete immunisation in Victorian children.** *Aust N Z J Public Health* 2004, **28**:72-79.
26. Fisher DA, Murray JM, Cleary MI, Brewerton RE: **The Aboriginal and Torres Strait Islander casemix study.** *Med J Aust* 1998, **169** Suppl:S11-16.
